# Supplementary material for: Modified TPPA combined with western blotting facilitates syphilis diagnosis in isolated reactive treponemal chemiluminescence immunoassay sera: a prospective cohort study
Source: PubMed Central journal article supplement — BMC Infect Dis. 2025 Jan 2;25:6. doi: 10.1186/s12879-024-10404-1 (PMC11697872; doi:10.1186/s12879-024-10404-1), 2025-01-02
Supplement: 12879_2024_10404_MOESM1_ESM.pdf [file 12879_2024_10404_MOESM1_ESM.pdf]

# **Modified TPPA Combined with Western Blotting Facilitates Syphilis Diagnosis in Isolated Reactive Treponemal Chemiluminescence Immunoassay Sera: A Prospective Cohort Study**

Xia Luo, MS<sup>1\*</sup>, Hua Xiao, BS<sup>2\*</sup>, Yanfang Lu, MD<sup>3,4,5,6</sup>, Weiming Gu, MD<sup>7</sup>, Ziyong Sun, MD<sup>1</sup>, Jing Peng, MD<sup>1#</sup>, Liming Cheng, MD<sup>1#</sup>

<sup>1</sup>Department of Laboratory Medicine, Tongji Hospital, Tongji Medical College, Huazhong University of Science and Technology, Wuhan, China;

<sup>2</sup>Department of Clinical Laboratory, Zhengzhou Central Hospital Affiliated to Zhengzhou University, Zhengzhou, 450007, Henan, People's Republic of China;

<sup>3</sup>Department of Integrated Traditional and Western Nephrology, The First Affiliated Hospital of Zhengzhou University, Zhengzhou, China;

<sup>4</sup>Research Institute of Nephrology, Zhengzhou University, Zhengzhou, China;

<sup>5</sup>Henan Province Research Center for Kidney Disease, Zhengzhou, China;

<sup>6</sup>Key Laboratory of Precision Diagnosis and Treatment for Chronic Kidney Disease in Henan Province, Zhengzhou, China.

<sup>7</sup>Shanghai Skin Disease Hospital, Tongji University School of Medicine, Shanghai, China.

**Supplemental Table S1. Clinical and serological characteristics of individuals with discordant TPPA (titer, 1:80) and WB results**

| Sample No. | Gender | Age  | CIA S/CO | TPPA (titer, 1:80) | WB            | RPR         | Modified TPPA (titer, 1:20) | Prior serological result(s)                                                                               | Subsequent serological result(s)                                                                           | History of prior syphilis | Treatment for syphilis | Diagnosis for syphilis |
|------------|--------|------|----------|--------------------|---------------|-------------|-----------------------------|-----------------------------------------------------------------------------------------------------------|------------------------------------------------------------------------------------------------------------|---------------------------|------------------------|------------------------|
| 1          | F      | 49 y | 3.47     | Reactive           | Indeterminate | Nonreactive | Reactive                    | CIA reactive, TPPA reactive, RPR nonreactive (2 mo), CIA reactive, TPPA reactive, RPR nonreactive (13 mo) | CIA reactive, TPPA reactive, RPR nonreactive (19 mo)                                                       | Yes                       | None                   | Yes                    |
| 2          | F      | 81 y | 12.7     | Reactive           | Indeterminate | Reactive    | Reactive                    | CIA reactive, TPPA reactive, RPR reactive (2 mo)                                                          | CIA reactive, TPPA reactive, RPR reactive (34 mo)                                                          | Yes                       | None                   | Yes                    |
| 3          | F      | 44 y | 3.46     | Reactive           | Indeterminate | Nonreactive | Reactive                    | None                                                                                                      | CIA reactive, TPPA reactive, RPR nonreactive (15 mo)                                                       | None                      | None                   | Yes                    |
| 4          | F      | 29 y | 8.14     | Reactive           | Indeterminate | Nonreactive | Reactive                    | None                                                                                                      | None                                                                                                       | None                      | None                   | Yes                    |
| 5          | M      | 55 y | 4.59     | Reactive           | Indeterminate | Nonreactive | Reactive                    | None                                                                                                      | None                                                                                                       | None                      | None                   | Yes                    |
| 6          | M      | 46 y | 2.25     | Reactive           | Indeterminate | Nonreactive | Reactive                    | None                                                                                                      | None                                                                                                       | None                      | None                   | Yes                    |
| 7          | F      | 38 y | 7.99     | Reactive           | Indeterminate | Nonreactive | Reactive                    | None                                                                                                      | None                                                                                                       | None                      | None                   | Yes                    |
| 8          | F      | 2 m  | 3.61     | Reactive           | Indeterminate | Nonreactive | Reactive                    | CIA reactive, TPPA reactive, RPR nonreactive (1mo)                                                        | CIA nonreactive (17 mo)                                                                                    | Yes                       | None                   | Yes                    |
| 9          | M      | 57 y | 3.45     | Reactive           | Indeterminate | Nonreactive | Reactive                    | None                                                                                                      | CIA reactive, TPPA reactive, RPR nonreactive (28 mo), CIA reactive, TPPA reactive, RPR nonreactive (57 mo) | None                      | None                   | Yes                    |
| 10         | F      | 38 y | 1.65     | Reactive           | Indeterminate | Nonreactive | Reactive                    | None                                                                                                      | None                                                                                                       | None                      | None                   | Yes                    |
| 11         | M      | 37 y | 1.03     | Reactive           | Indeterminate | Nonreactive | Reactive                    | None                                                                                                      | None                                                                                                       | None                      | None                   | Yes                    |
| 12         | M      | 26 y | 9.64     | Reactive           | Nonreactive   | Nonreactive | Reactive                    | None                                                                                                      | None                                                                                                       | None                      | None                   | Yes                    |
| 13         | F      | 62 y | 6.2      | Reactive           | Nonreactive   | Nonreactive | Reactive                    | None                                                                                                      | None                                                                                                       | None                      | None                   | Yes                    |
| 14         | M      | 60 y | 1.32     | Reactive           | Nonreactive   | Nonreactive | Reactive                    | None                                                                                                      | None                                                                                                       | None                      | None                   | Yes                    |
| 15         | F      | 57 y | 8.07     | Reactive           | Nonreactive   | Nonreactive | Reactive                    | None                                                                                                      | None                                                                                                       | None                      | Yes                    | Yes                    |
| 16         | M      | 60 y | 2.79     | Reactive           | Nonreactive   | Nonreactive | Reactive                    | None                                                                                                      | CIA reactive, TPPA reactive, RPR nonreactive (18 mo)                                                       | None                      | None                   | Yes                    |
| 17         | M      | 13 d | 1.24     | Reactive           | Nonreactive   | Nonreactive | Reactive                    | None                                                                                                      | None                                                                                                       | None                      | None                   | Yes                    |
| 18         | F      | 39 y | 1.42     | Reactive           | Nonreactive   | Nonreactive | Reactive                    | CIA reactive, TPPA reactive, RPR nonreactive (1 mo)                                                       | None                                                                                                       | Yes                       | None                   | Yes                    |
| 19         | M      | 49 y | 1.31     | Reactive           | Nonreactive   | Nonreactive | Reactive                    | None                                                                                                      | None                                                                                                       | None                      | None                   | Yes                    |
| 20         | M      | 1 y  | 1.77     | Reactive           | Nonreactive   | Nonreactive | Reactive                    | None                                                                                                      | None                                                                                                       | None                      | None                   | Yes                    |
| 21         | M      | 29 y | 3.19     | Nonreactive        | Reactive      | Nonreactive | Reactive                    | None                                                                                                      | None                                                                                                       | None                      | None                   | Yes                    |
| 22         | F      | 60 y | 17.3     | Nonreactive        | Reactive      | Nonreactive | Nonreactive                 | Isolated reactive CIA (29 mo)                                                                             | None                                                                                                       | None                      | None                   | Yes                    |
| 23         | F      | 27 y | 3.97     | Nonreactive        | Reactive      | Nonreactive | Nonreactive                 | None                                                                                                      | Isolated reactive CIA (4 mo)                                                                               | None                      | None                   | Yes                    |
| 24         | F      | 62 y | 5.2      | Nonreactive        | Reactive      | Reactive    | Reactive                    | CIA reactive, reactive TPPA, RPR reactive (2 mo); CIA reactive, TPPA reactive, RPR                        | CIA reactive, TPPA nonreactive, RPR reactive (17 mo)                                                       | Yes                       | None                   | Yes                    |

|    |   |      |      |             |               |             |             |                                                                                                                                                                       |                                                                                                                    |      |      |      |
|----|---|------|------|-------------|---------------|-------------|-------------|-----------------------------------------------------------------------------------------------------------------------------------------------------------------------|--------------------------------------------------------------------------------------------------------------------|------|------|------|
|    |   |      |      |             |               |             |             | reactive (1 mo)                                                                                                                                                       |                                                                                                                    |      |      |      |
| 25 | F | 74 y | 34.4 | Nonreactive | Reactive      | Reactive    | Nonreactive | None                                                                                                                                                                  | None                                                                                                               | None | None | Yes  |
| 26 | M | 61 y | 11.6 | Nonreactive | Reactive      | Nonreactive | Reactive    | CIA reactive, TPPA reactive, RPR nonreactive (2 mo)                                                                                                                   | None                                                                                                               | Yes  | None | Yes  |
| 27 | M | 62 y | 1.33 | Nonreactive | Indeterminate | Nonreactive | Reactive    | None                                                                                                                                                                  | None                                                                                                               | None | None | None |
| 28 | M | 92 y | 5.06 | Nonreactive | Indeterminate | Nonreactive | Reactive    | CIA reactive, TPPA reactive, RPR nonreactive (54 mo); CIA reactive, TPPA indeterminate, RPR nonreactive (25 mo); CIA reactive, TPPA reactive, RPR nonreactive (13 mo) | CIA reactive, TPPA indeterminate, RPR nonreactive (12 mo), CIA reactive, TPPA nonreactive, RPR nonreactive (23 mo) | Yes  | None | Yes  |
| 29 | F | 27 y | 3.67 | Nonreactive | Indeterminate | Nonreactive | Nonreactive | None                                                                                                                                                                  | Isolated reactive CIA (6 mo), isolated reactive CIA (30 mo)                                                        | None | None | None |
| 30 | F | 45y  | 6.28 | Nonreactive | Indeterminate | Nonreactive | Nonreactive | None                                                                                                                                                                  | None                                                                                                               | None | None | None |
| 31 | F | 44 y | 3.33 | Nonreactive | Indeterminate | Nonreactive | Nonreactive | None                                                                                                                                                                  | Isolated reactive CIA (1 mo), isolated reactive CIA (6 mo)                                                         | None | None | None |
| 32 | F | 25 y | 4.19 | Nonreactive | Indeterminate | Nonreactive | Nonreactive | Isolated reactive CIA (6 mo)                                                                                                                                          | None                                                                                                               | None | None | None |
| 33 | M | 29 y | 4.58 | Nonreactive | Indeterminate | Nonreactive | Nonreactive | None                                                                                                                                                                  | None                                                                                                               | None | None | None |
| 34 | F | 51 y | 5.67 | Nonreactive | Indeterminate | Nonreactive | Nonreactive | None                                                                                                                                                                  | None                                                                                                               | None | None | None |

Abbreviations: CIA, chemiluminescent immunoassay; S/CO, signal-to-cutoff ratio; TPPA, *Treponema pallidum* particle agglutination assay; RPR, rapid plasma reagin test; WB, western blotting.
